# Supplementary material
Source: Springer Nature journal article supplement (https://www.springermedizin.de/resource/supplementary/12967_2012_1426_MOESM6_ESM.pdf/9574664)

miR-150 relative expression level

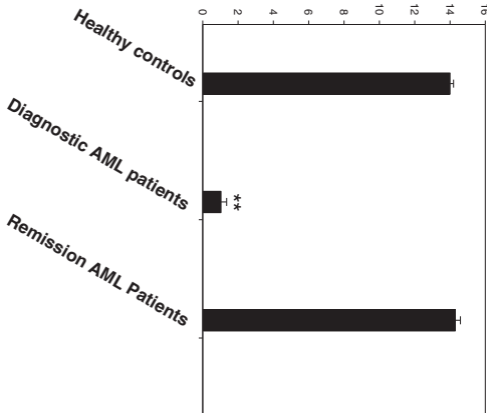

miR-342 relative expression level

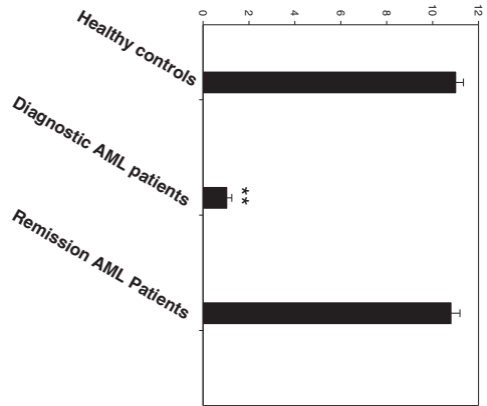

Supplement: MOESM6 [file 9574664]
